# Supplementary material
Source: Springer Nature journal article supplement (https://www.springermedizin.de/resource/supplementary/13045_2010_112_MOESM4_ESM.pdf/9660680)

# Arsenic Trioxide ( $\mu\text{g}/\text{mL}$ )

---

M 0 2 4 6 8

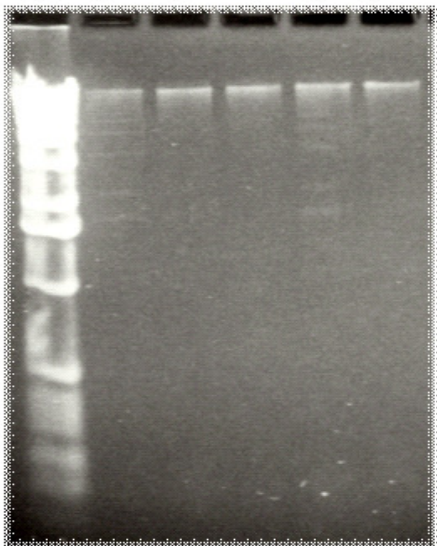

Supplement: MOESM4 [file 9660680]
